# Supplementary material
Source: PubMed Central journal article supplement (PMC5963692)
Supplement: NIHMS966020-supplement-Supporting_material.pdf [file NIHMS966020-supplement-Supporting_material.pdf]

# Identification of a Small Molecule Activator for AphB, a LysR-Type Virulence Transcriptional Regulator in *Vibrio cholerae*

Britney R. Privett<sup>1</sup>, Maria Pellegrini<sup>1</sup>, Gabriela Kovacikova<sup>2</sup>, Ronald K. Taylor<sup>2,†</sup>,  
Karen Skorupski<sup>2</sup>, Dale Mierke<sup>2</sup>, F. Jon Kull<sup>1\*</sup>

<sup>1</sup>Department of Chemistry, Dartmouth College, Hanover NH 03755, USA

<sup>2</sup>Department of Microbiology and Immunology, Geisel School of Medicine, Hanover NH 03755, USA.

\*Corresponding Author: F. Jon Kull, Department of Chemistry, Dartmouth College, Hanover NH 03755, USA. [F.Jon.Kull@dartmouth.edu](mailto:F.Jon.Kull@dartmouth.edu)

## Supporting Information:

**Table S1. Strains and plasmids used in this study**

| Strain<br>Or plasmid | Genotype and relevant<br>characteristics          | Reference<br>or source   |
|----------------------|---------------------------------------------------|--------------------------|
| Strains              |                                                   |                          |
| <i>V. cholerae</i>   |                                                   |                          |
| O395                 | Classical Ogawa Sm <sup>r</sup>                   | Laboratory<br>collection |
| KSK618               | O395 $\Delta lacZ$ <i>tcpP-lacZ</i>               | 1                        |
| GK121                | KSK618 $\Delta aphB$                              | 2                        |
| Plasmids             |                                                   |                          |
| pWEL218              | <i>aphB</i> (classical), Ap <sup>r</sup>          | 3                        |
| pRDS1                | <i>aphB</i> (classical) M76-Q291, Ap <sup>r</sup> | 3                        |
| pBRT4                | <i>aphB</i> (classical) M1-G91, Ap <sup>r</sup>   | This work                |

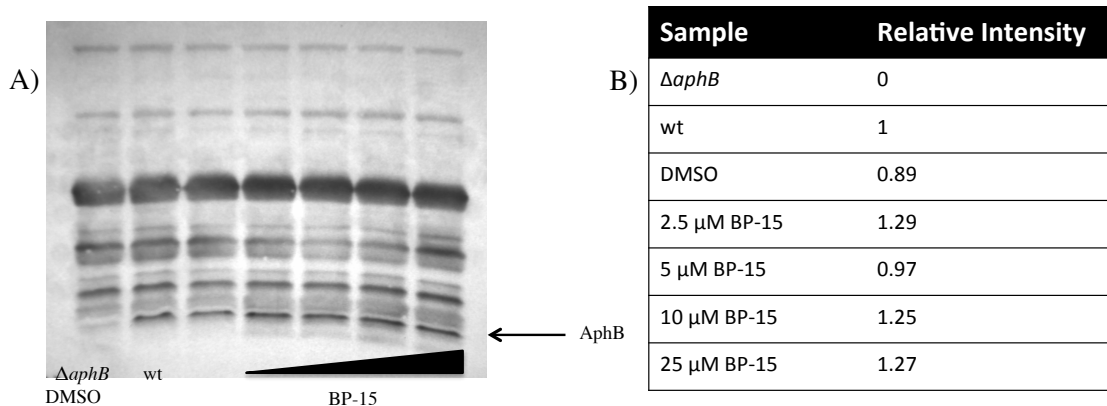

**Figure S1. Western Blot of AphB.** A) Uncropped Western blot of AphB from  $\beta$ -galactosidase assay. B) Relative intensities of the bands as measured by Kodak Imaging Systems software.

**Supplementary References:**

- (1) Skorupski, K., and Taylor, R. K. (1999) A new level in the *Vibrio cholerae* ToxR virulence cascade: AphA is required for transcriptional activation of the tcpPH operon, *Mol. Microbiol.* 31, 763-771.
- (2) Kovacikova, G., and Skorupski, K. (1999) A *Vibrio cholerae* LysR homolog, AphB, cooperates with AphA at the tcpPH promoter to activate expression of the ToxR virulence cascade, *J. Bacteriol.* 181, 4250.
- (3) Taylor, J. L., De Silva, R. S., Kovacikova, G., Lin, W., Taylor, R. K., Skorupski, K., and Kull, F. J. (2012) The crystal structure of AphB, a virulence gene activator from *Vibrio cholerae*, reveals residues that influence its response to oxygen and pH, *Mol. Microbiol.* 83, 457.
